1 **Cross-talk between tissues is critical for intergenerational acclimation to environmental**  
2 **change**

3

4 Sneha Suresh<sup>1</sup>, Megan J Welch<sup>2</sup>, Philip L Munday<sup>2</sup>, Timothy Ravasi<sup>3,4</sup>, Celia Schunter<sup>1,5\*</sup>

5

6 <sup>1</sup>Swire Institute of Marine Science and School of Biological Sciences, The University of  
7 Hong Kong, Hong Kong SAR

8 <sup>2</sup>Australian Research Council Centre of Excellence for Coral Reef Studies, James Cook  
9 University, Townsville, Australia

10 <sup>3</sup>Marine Climate Change Unit, Okinawa Institute of Science & Technology Graduate  
11 University, Onna-son, Japan

12 <sup>4</sup>Australian Research Council Centre of Excellence for Coral Reef Studies, James Cook  
13 University, Townsville, Australia

14 <sup>5</sup>State Key Laboratory of Marine Pollution, City University of Hong Kong, Hong Kong,  
15 Hong Kong SAR, China

16

17

18 \*Corresponding author

19 Correspondence: [celiaschunter@gmail.com](mailto:celiaschunter@gmail.com)

20

21 **Abstract**

22 An organism's reaction to environmental changes is mediated by coordinated responses of  
23 multiple tissues. Additionally, parental priming may increase offsprings' acclimation potential  
24 to changing environmental conditions. As acidification of oceans continues to intensify it is  
25 critical to assess the acclimation potential of species at the whole organismal scale. To do this  
26 we need to understand the cross-talk between tissues in regulating and responding to pH  
27 changes. Here by using a multi-tissue approach we determine the influence of 1) variation in  
28 parental behavioural tolerance and 2) parental environment, on molecular responses of their  
29 offspring in a coral reef fish. The gills and liver showed the highest transcriptional response to  
30 OA conditions in juvenile fish regardless of the parental environment, while the brain and liver  
31 showed the greatest signal of intergenerational acclimation. Key functional pathways that were  
32 altered in the brain and liver upon within-generational CO<sub>2</sub> exposure were restored to control  
33 levels when parents were exposure to OA conditions. Furthermore, the expression of a new  
34 complement of genes involved in key functions were altered in the offspring only when the  
35 parents were previously exposed to OA conditions. Therefore, previous parental conditioning  
36 to ocean acidification can reprogram tissue transcriptomic profiles of the offspring enabling  
37 them to better cope in an environment with elevated CO<sub>2</sub> levels. Overall, our results show that  
38 intergenerational plasticity is key in evolutionarily adaptation to global change and illustrates  
39 how transcriptional changes across multiple tissues integrate to facilitate organismal  
40 acclimation to OA.

41

42 **Keywords:** Climate change, multi-tissue, intergeneration, acclimation, ocean acidification,  
43 transcriptomics, spiny damselfish.

44

45 **Significance statement**

46           With the global climate changing rapidly, organisms need to acclimate to the new  
47 conditions to survive. Assessing the adaptive potential of complex organisms such as  
48 vertebrates is especially challenging as each tissue has its own unique function. However,  
49 acclimation of organisms to changes in their environment requires functional integration of all  
50 tissues which is usually overlooked in climate change research. Here we reveal that cross-  
51 communication between tissues is crucial in the adaptive response of organisms to future ocean  
52 conditions. Furthermore, both parental environment and parental behavioral variability  
53 influence the transcriptional reprogramming of offspring tissues in response to elevated CO<sub>2</sub>.  
54 Overall, it is the integration of transcriptional changes across multiple tissues that mediates  
55 intergenerational plasticity to future changes in ocean chemistry.

56

57

## 58 **Introduction**

59           With the global climate continuously shifting to more extreme conditions organisms  
60 need to acclimate and/or adapt to the changing environments in order to survive. The oceans  
61 are becoming increasingly acidified as they absorb a major portion of anthropogenic CO<sub>2</sub>  
62 emissions (Pörtner et al., 2022) leading to ocean acidification (OA) which is reported to  
63 negatively impact the physiology and behavior of various marine organisms including fish  
64 (Heuer & Grosell, 2014; Strader et al., 2020). However, increasing evidence suggests that  
65 multi-generational exposure to elevated CO<sub>2</sub> conditions could influence the adaptive capacity  
66 of future generations to OA conditions (Nagelkerken et al., 2023). In fact, several studies have  
67 reported transgenerational acclimation in a number of fish species as well as some invertebrates  
68 to OA (Strader et al., 2020). Specifically, transgenerational exposure to elevated CO<sub>2</sub>  
69 conditions has been shown to facilitate acclimation of metabolism, growth, survival, neuronal  
70 plasticity and behavior in independent studies (Allan et al., 2014; Miller et al., 2012; Monroe  
71 et al., 2021; Munday, 2014; Schade et al., 2014; Schunter et al., 2016, 2018; Stiasny et al.,  
72 2018) however, we are still learning about the underlying molecular mechanisms of such  
73 acclimation process.

74           Additionally, variation both within and across species in the biological responses to OA  
75 also exists due to differences in their evolutionary and environmental history. Studies  
76 examining the effect of elevated CO<sub>2</sub> on metabolism, growth, development, and reproduction  
77 in fish show variable results with some species being more affected than others (Heuer &  
78 Grosell, 2014). Variation in sensitivity to elevated CO<sub>2</sub> within a population could be crucial in  
79 long-term adaptation through selection of more tolerant individuals. Indeed, individual  
80 variation in behavioural tolerance to elevated CO<sub>2</sub> exposure has been reported to be heritable  
81 and hence could facilitate rapid selection of tolerant genotypes in the population (Lehmann et  
82 al., 2022; Welch & Munday, 2017). Such selection for CO<sub>2</sub> tolerance has been shown to occur

83 in nature, which could result in populations consisting of individuals with greater behavioural  
84 tolerance to elevated CO<sub>2</sub> (Munday et al., 2013). Furthermore, inter-individual variation in  
85 sensitivity to ocean acidification could have an epigenetic basis (Ryu et al., 2018; Turner, 2009)  
86 and in fact several studies have reported the expression levels of genes involved in epigenetic  
87 processes to be altered upon exposure to elevated CO<sub>2</sub> conditions (Huang et al., 2019; Schunter  
88 et al., 2018). Transfer of epigenetic factors from parents to offspring (epigenetic inheritance)  
89 could be one of the potential mechanisms of inter- and trans-generational acclimation and  
90 eventual adaptation to OA.

91 Adaptive processes to environmental changes at the organismal level requires  
92 integrated activity of various tissues, with each tissue undergoing changes in its transcriptional  
93 landscape resulting in the overall response of the organism. However, to date, research has  
94 mainly focused on individual tissue functional changes in response to OA with less emphasis  
95 on how these changes integrate to create a whole-body response. Several studies have  
96 examined the effects of OA on brain and neurosensory systems since the discovery of impaired  
97 behavioural responses in various fish species in elevated CO<sub>2</sub> conditions. The altered  
98 behavioural responses have been linked to changes in the functioning of the GABAergic  
99 signaling pathway (Schunter et al., 2019) and the circadian rhythm in the brain of fish exposed  
100 to elevated CO<sub>2</sub> (Lee et al., 2021; Schunter et al., 2016; Williams et al., 2019). Previous studies  
101 have also focused on the effects of OA conditions on the gill transcriptome due to it being the  
102 primary organ involved in acid-base regulation, immune defences, and stress response, and  
103 hence plays a vital role in maintaining cellular homeostasis under conditions of CO<sub>2</sub> stress (De  
104 Souza et al., 2014; Deigweiher et al., 2008, 2010). These processes are energetically expensive  
105 and indeed changes in the aerobic metabolic scope (Crespel et al., 2019; Gräns et al., 2014;  
106 Pimentel et al., 2014; Rummer et al., 2013) and expression levels of key metabolic genes  
107 (Frommel et al., 2020) have been reported in fish exposed to elevated CO<sub>2</sub>. Therefore, exposure

108 to elevated CO<sub>2</sub> affects various aspects of fish physiology such as metabolism, cellular redox  
109 status, ion transport and acid-base homeostasis, neurological functioning and behavior thereby  
110 exerting a whole-body functional reprogramming (Grosell et al. 2019). Therefore, a systematic  
111 transcriptomic analysis is needed to determine how the biological processes associated with  
112 each tissue integrate together within the whole-organism to drive adaptive responses to  
113 elevated CO<sub>2</sub> environments.

114 In this study we conducted an intergenerational CO<sub>2</sub> exposure experiment and  
115 performed systematic analysis of gene expression changes in response to elevated CO<sub>2</sub> across  
116 three tissues, the brain, the gills, and the liver, in the spiny damselfish *Acanthochromis*  
117 *polyacanthus*. While *A. polyacanthus* can be sensitive to increases in water temperature and  
118 CO<sub>2</sub> levels, they have the potential to acclimate to the changing environmental conditions  
119 across multiple generations (Donelson et al., 2012; Schunter et al., 2016, 2018; Veilleux et al.,  
120 2015). *A. polyacanthus* has been used as a model to study the impacts of climate change, and  
121 also to investigate the molecular basis of intergenerational plasticity to environmental changes,  
122 due to its advantageous life-history traits for laboratory studies (Robertson, 1973), however  
123 past studies have only focused on single tissues (Ryu et al., 2018; Schunter et al., 2016, 2018).  
124 Here, by using a multi-tissue transcriptomic approach we aim to determine how dynamic cross-  
125 talk between tissues maintains whole-body homeostasis under future ocean acidification  
126 conditions. Additionally, we also assess how the acclimatory response of offspring mediated  
127 by transcriptional reprogramming across multiple tissues is influenced by variation in parental  
128 sensitivity to elevated CO<sub>2</sub> and parental environment. Through systemic characterization of the  
129 effects of OA we aim to identify how the adaptive processes within each tissue integrate to  
130 drive intergenerational acclimation to OA at the organismal level.

131

## 132 **Methods**

### 133 **Sample collection, behavioural testing, and experimental design**

134       Adult *Acanthochromis polyacanthus* were collected from the wild on the Great Barrier  
135 Reef, Australia (18°38'24.3"S, 146°29'31.8"E) and exposed to elevated CO<sub>2</sub> (754 ± 92 µatm)  
136 for seven days following which their behavioural sensitivity to conspecific chemical alarm cues  
137 (CAC) was tested using a two-chamber flume as described previously (Schunter et al., 2016).  
138 Briefly, the fish were classified as being behaviorally sensitive or tolerant to elevated CO<sub>2</sub>  
139 based on the amount of time spent in water containing the CAC. Sensitive individuals spent ≥  
140 70% time in CAC whereas tolerant individuals spent ≤ 30% time in CAC. Individuals of similar  
141 size displaying the same behavioural phenotype (sensitive or tolerant) were then grouped into  
142 breeding pairs and held in either control (414 ± 46 µatm) or elevated CO<sub>2</sub> conditions (754 ± 92  
143 µatm) for three months prior to the breeding season. Offspring clutches from each breeding  
144 pair were placed into three different experimental treatments resulting in three combinations of  
145 parent-offspring conditions for each parental phenotype: (1) Control treatment – Parents and  
146 offspring held at control condition (414 ± 46 µatm); (2) Developmental treatment – Parents  
147 held at control condition and offspring exposed to elevated CO<sub>2</sub> (754 ± 92 µatm) immediately  
148 after hatching; and (3) Intergenerational treatment – Parents and offspring exposed to elevated  
149 CO<sub>2</sub> (754 ± 92 µatm). The offspring were held in their respective conditions until they were  
150 five months old after which nine fish from each parental phenotype, from each treatment  
151 condition (N = 27 from each parental phenotype; N = 54 total fish sampled) were euthanized  
152 and the brain, gills and liver were dissected, snap frozen in liquid nitrogen and stored at -80 °C  
153 until further processing (Supplementary Figure S1).

### 154 **RNA extraction, sequencing, and gene expression analyses**

155 Total RNA was extracted from the fish brains, livers and gills using the AllPrep  
156 DNA/RNA Mini kit from Qiagen following the manufacturer's instructions. RNA quality was  
157 determined using nanodrop and Agilent Bioanalyzer and samples having an RNA integrity  
158 value (RIN)  $\geq 8$  were sequenced using Illumina HiSeq 2500 to get paired-end reads of 100 bp  
159 at Macrogen Inc., South Korea. A total of  $1,614.25 \pm 3.05$ ,  $2,367.03 \pm 5.19$ , and  $2,227.23 \pm$   
160  $6.37$  million raw paired-end reads were obtained from the 162 sequenced libraries from brain,  
161 gills and liver respectively which included nine control, nine developmental and nine  
162 intergenerational samples for each parental phenotype for each tissue (Supplementary Table  
163 S1). The quality of the raw reads were examined using FastQC (Andrews, 2010) v0.11.8 and  
164 adapters and low quality sequences were trimmed using Trimmomatic (Bolger et al., 2014)  
165 v0.39 (ILLUMINACLIP: adapters.fa:2:30:15:8:true; SLIDINGWINDOW:4:20; MINLEN:32).  
166 Only those sequences  $\geq 32$  bp in length with both the forward and reverse reads retained after  
167 trimming were used for further analysis. Potential contaminant sequences were identified using  
168 kraken (Wood & Salzberg, 2014) v2.0.8-beta, with a confidence score of 0.3, using the bacteria,  
169 fungi and virus RefSeq genomic libraries as reference and removed from further analyses. A  
170 total of  $1,510.51 \pm 2.62$ ,  $2,254.16 \pm 4.95$ , and  $2,116.25 \pm 6.04$  million high-quality sequences  
171 were retained after the filtering process (Supplementary Table S1). These sequences were  
172 mapped to the *Acanthochromis polyacanthus* reference genome (unpublished) using HISAT2  
173 (Kim et al., 2019) v2.1.0. On average,  $84 \pm 1.83\%$ ,  $91.22 \pm 0.66\%$ , and  $93.33 \pm 0.81\%$  reads  
174 mapped to the reference genome from the brain, gills, and liver respectively (Supplementary  
175 Table S1). Raw read counts per gene were obtained using featureCounts (Liao et al., 2014)  
176 v2.0.0 (parameters: -B -J -M --fraction), assigning fractional counts to multi-mapped reads.  
177 Exploring the gene expression patterns across the whole dataset (162 samples) using principal  
178 component analysis (PCA) revealed a clear clustering of samples by tissues indicating that  
179 tissues vary greatly in their gene expression patterns (Supplementary Figure S2). Subsequent



180 analysis of differences in gene expression levels was therefore carried out separately for each  
181 tissue using the DESeq2 (Love et al., 2014) v1.32.0 package in R (R Core Team, 2021) v4.2.1.

182 Principal component analysis (PCA) using the regularized log transformed (rlog)  
183 counts was done in R v4.2.1 to detect and remove outlier samples. A likelihood ratio test (LRT)  
184 using a model comparison approach was then used to determine the effect of family line in  
185 driving the gene expression patterns and to determine the best design formula for the final DE  
186 analysis. First, significant differences in gene expression were measured by comparing a model  
187 including treatment and family line against a reduced model without the family line factor  
188 separately for each tissue. For a total of 924, 910, and 923 genes in the brain, gills, and liver  
189 respectively, the model including family line better explained the observed differences in gene  
190 expression compared to the reduced model excluding this factor (FDR corrected p-value < 0.05;  
191 Supplementary Table S2). Pair-wise comparisons between the control, developmental and  
192 intergenerational treatment was then carried out in DESeq2 (accounting for the family effect,  
193 using Wald test) separately for each parental phenotype for each tissue to determine the effect  
194 of parental environment and parental tolerance to CO<sub>2</sub> on the molecular responses of the  
195 offspring to elevated CO<sub>2</sub>. For each pair-wise comparison, the genes were considered to be  
196 significantly differentially expressed (DE) if the False Discovery Rate (FDR) adjusted p-value  
197 was less than 0.05, the absolute log 2-fold change in expression was greater than 0.3 and  
198 baseMean was greater than 10. Functional enrichment analysis of the significant DE genes was  
199 carried out in OmicsBox (<https://www.biobam.com/omicsbox>) v1.4.11 using Fisher's Exact  
200 Test (FDR corrected p-value < 0.05) with the option of reducing to most specific GO terms to  
201 reduce redundancy. GO terms that were identified to be over-represented among the DE genes  
202 were also retained. The genes associated with the enriched and over-represented GO terms  
203 were further categorized into broader functional groups based on their functional description

204 from the UniProt knowledgebase (UniProtKB; <https://www.uniprot.org/>). All figures are made  
205 using ggplot in R v4.2.1.

206

## 207 **Results**

### 208 **Molecular processes affected by all elevated CO<sub>2</sub> treatments**

209 To understand a general effect of elevated CO<sub>2</sub> exposure regardless of time of exposure  
210 to elevated CO<sub>2</sub> we identified genes that were commonly differentially expressed (DE) in both  
211 the developmental and intergenerational treatments compared to control (Figure 1(a)(i)), which  
212 are considered the general “CO<sub>2</sub> response genes” (Supplementary Table S4). There was high  
213 tissue specificity in transcriptional response in both the elevated CO<sub>2</sub> treatments compared to  
214 control with no genes being commonly DE across the three tissues in the sensitive parental  
215 phenotype and only 3 and 81 genes being shared between the brain and gills, and liver and gills  
216 respectively in the tolerant parental phenotype (Supplementary Figure S3(a)). Liver had the  
217 greatest number of genes commonly differentially expressed in both the elevated CO<sub>2</sub>  
218 treatments compared to control, followed by the gills (Figure 1(b), Supplementary Table S3).  
219 Overall, offspring of tolerant parents had more differentially expressed (DE) genes in all tissues,  
220 with the difference in DE gene numbers between sensitive and tolerant phenotypes being more  
221 pronounced in the gills and liver than in the brain (Figure 1(b)).

222

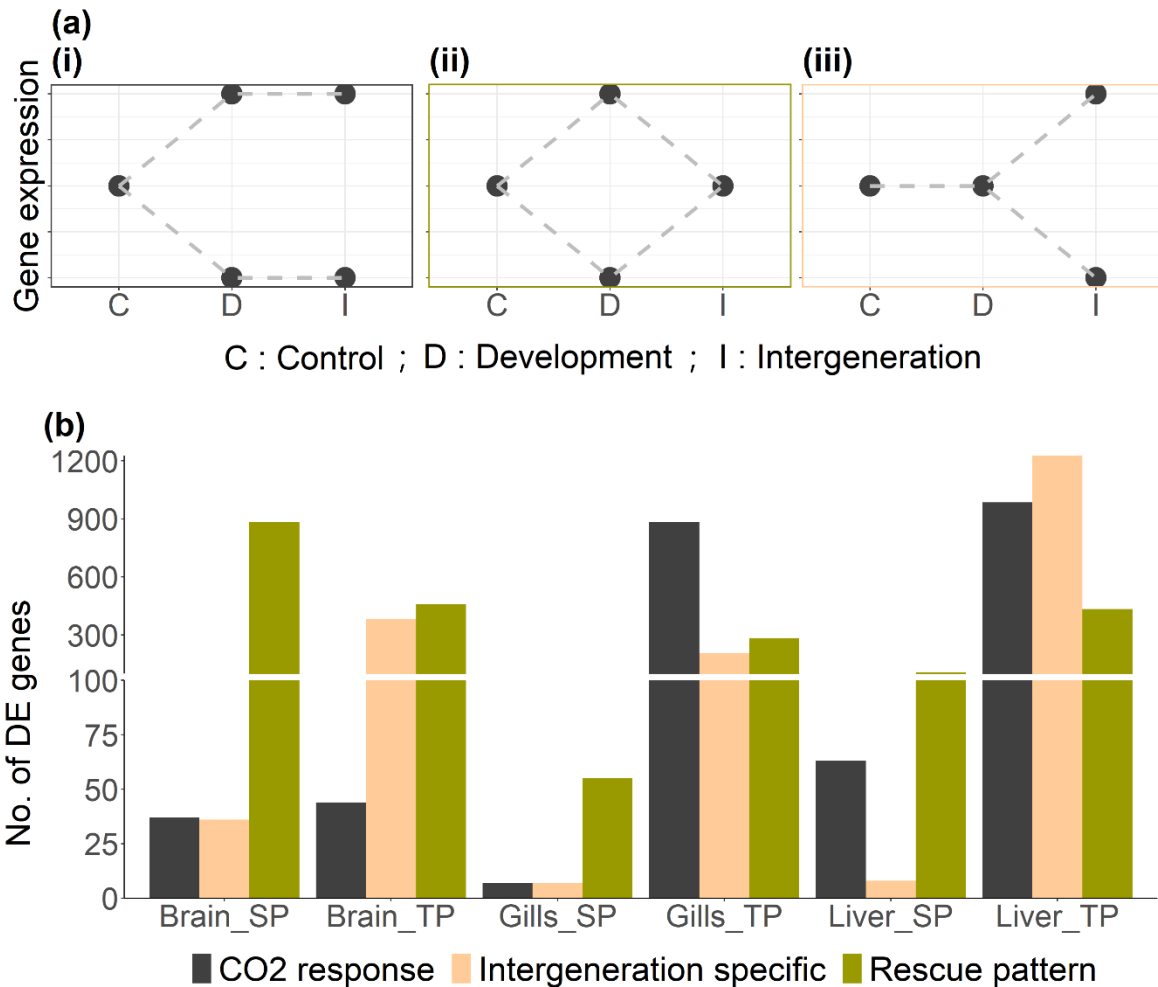

223

224 **Figure 1:** (a) Schematic graph representing the expression profile of (i) CO<sub>2</sub>-response genes,  
 225 (ii) genes showing a rescue pattern, and (iii) intergeneration-specific genes. (b) Number of  
 226 differentially expressed genes across the three treatments in all the three tissues. SP indicates  
 227 samples with a sensitive parental phenotype and TP indicates samples with a tolerant parental  
 228 phenotype for each of the respective tissues. Note scale break in y-axis at 100 DE genes.  
 229

230

231

232

233

234

235

236

237

The three tissues also differed substantially in terms of functions associated with the  
 CO<sub>2</sub>-response genes. Only three functions, biosynthetic process, transport, and binding, were  
 differentially regulated in all the three tissues. Gills showed the highest specificity in functional  
 signatures with pentose-phosphate pathway, cytoskeleton, and protein folding/modification  
 being primarily over-represented among the DE genes only in this tissue. Genes involved in  
 cellular stress response were differentially regulated both in the brain and gills and genes  
 involved in immune response, energy metabolism, and ubiquitin dependent protein catabolism  
 were commonly differentially regulated in the gills and liver while transcription regulation was

238 primarily enriched only in the liver (Figure 2(a)). Interestingly, biosynthetic processes and  
 239 immune response were downregulated only in the liver but upregulated in the brain and gills  
 240 suggesting tissue specific regulation of these functional pathways (Supplementary Table S7,  
 241 S10).

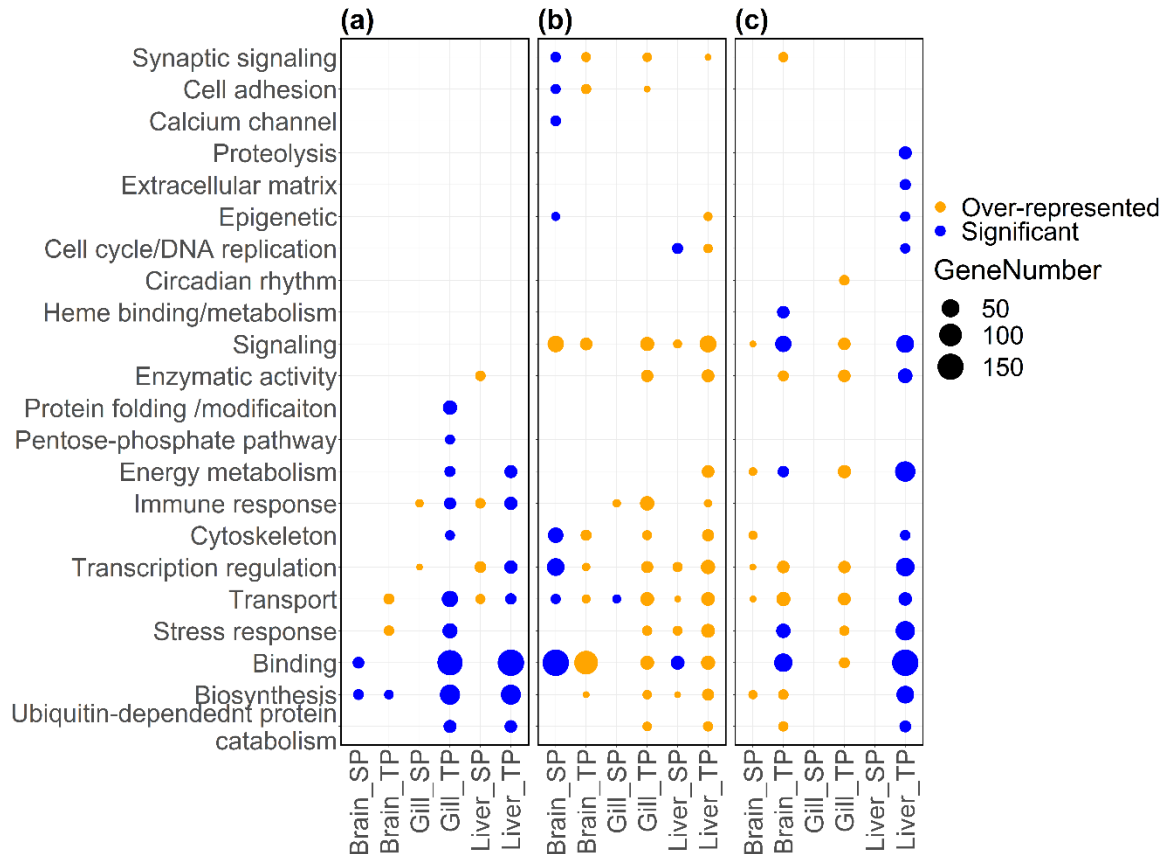

242  
 243 **Figure 2:** Functions that are significantly enriched (in blue; FDR < 0.05) or over-represented  
 244 (in orange; FDR > 0.05) among the DE genes involved in (a) overall CO<sub>2</sub> response, (b) rescue  
 245 pattern, and (c) intergenerational specific response. SP indicates samples with a sensitive  
 246 parental phenotype and TP indicates samples with a tolerant parental phenotype.  
 247

## 248 Parental exposure to elevated CO<sub>2</sub> “rescues” developmental effects

249 A total of 1220, 328, and 542 genes that were DE in the developmental treatment  
 250 (compared to control and intergeneration) in the brain, gills, and liver respectively returned to  
 251 control levels in the offspring whose parents were previously exposed to OA conditions  
 252 suggesting cross-generation plasticity resulting in “rescue” of gene expression levels (Figure  
 253 1(a)(ii); Supplementary Table S5). Parental conditioning had the largest effect on brain gene

254 expression followed by the liver (Figure 1(b), Table S3). Similar to the CO<sub>2</sub>-affected genes,  
255 there were very few genes commonly DE across tissues (Supplementary Figure S3(b)).  
256 However, while the exact genes did not overlap, the majority of the underlying functional  
257 responses involved in intergenerational plasticity were commonly regulated across the three  
258 tissues (Figure 2(b)).

259 Functions such as transport (including transport of ions involved in pH homeostasis),  
260 synaptic signaling, signaling, RNA processing & transcription regulation, cytoskeleton-related,  
261 biosynthetic processes, and binding were commonly enriched or over-represented among the  
262 DE genes showing a “rescue” pattern. Liver showed the highest degree of specificity in  
263 functional regulation, with functions involved in cell cycle/ DNA replication and energy  
264 metabolism being primarily enriched or over-represented among the DE genes only in the liver.  
265 Additionally, epigenetic processes were commonly over-represented in the liver and brain, and  
266 immune response, stress response and ubiquitin dependent protein degradation processes were  
267 over-represented in both the liver and gills. Interestingly, although synaptic signaling was  
268 commonly over-represented in all tissues, calcium channel encoding genes, which are involved  
269 in neurotransmitter release, were differentially regulated mainly in the brain. This suggests that  
270 parental conditioning to elevated CO<sub>2</sub> selectively regulates certain specific functions in each  
271 tissue (Figure 2(b); Supplementary Table S8, S11).

## 272 **Intergenerational specific response to elevated CO<sub>2</sub>**

273 We found a large transcriptional response to elevated CO<sub>2</sub> that was only seen in the  
274 intergenerationally exposed fish and not in fish with only developmental (within generation)  
275 exposure to elevated CO<sub>2</sub>. This indicates plasticity of the offspring transcriptome due to  
276 parental conditioning to elevated CO<sub>2</sub> and was especially marked in offspring of tolerant  
277 parents (Figure 1(b)). These are genes that were only differentially expressed in the  
278 intergenerational treatment (compared to control and development) but were at control levels

279 in the developmental treatment (Figure 1(a)(iii)). Specifically, 383, 207, and 1,226 genes were  
280 DE in the brain, gills, and liver respectively in offspring with tolerant parents, while offspring  
281 with sensitive parents had 36, 7, and 8 DE genes in the brain, gills, and liver respectively that  
282 were specific to the intergenerational treatment (Supplementary Table S6). Offspring of both  
283 tolerant and sensitive parents showed high tissue specificity in the intergenerational specific  
284 transcriptional signature to elevated CO<sub>2</sub> with only one and five genes being commonly DE  
285 across all three tissues in the sensitive and tolerant parental phenotypes respectively  
286 (Supplementary Figure S3(c)).

287 Specifically, we found molecular signatures indicating bicarbonate retention only in the  
288 intergenerationally treated fish such as downregulation of SLC4A1, CFTR, SLC12A2, and  
289 SLC9A3 in the gills and upregulation of SLC4A4 in the brain which can buffer pH changes  
290 caused by elevated environmental CO<sub>2</sub> levels. Other key functional pathways that showed  
291 intergenerational specific regulation were epigenetic processes and energy metabolism (Figure  
292 2(c)). Therefore, fish whose parents also experience the same high CO<sub>2</sub> environment undergo  
293 rearrangements in their transcriptional landscape. This change in transcriptional signature  
294 could regulate the above mentioned “rescue” pattern and equip offspring to better cope with  
295 OA conditions (Supplementary Table S9, S12).

### 296 **Parental variability in CO<sub>2</sub> sensitivity impacts the offspring transcriptome**

297 Parental behavioural phenotype was found to have a substantial influence on the  
298 offspring transcriptional response. Across all three tissues, offspring with behaviorally tolerant  
299 parents when faced with elevated CO<sub>2</sub> had larger changes in gene expression levels ( $\log_2FC >$   
300 5; Figure 3) and a greater number of DE genes involved in the overall CO<sub>2</sub> response (common  
301 in developmental and intergenerational CO<sub>2</sub> exposure compared to control; Figure 1(b)). There  
302 were also very few genes involved in overall CO<sub>2</sub> response shared between the two parental  
303 phenotypes, specifically only six, three, and eleven common DE genes in the brain, gills, and

304 liver respectively (Supplementary Figure S3(a)). When considering genes involved in  
305 intergenerational plastic responses, there were more differentially expressed genes in the  
306 offspring of tolerant parents compared to those of sensitive parents, except for genes showing  
307 a rescue pattern in the brain (Figure 1(b)). Additionally, none of the DE genes involved in  
308 intergenerational plasticity were shared in the liver tissue between the two parental phenotypes  
309 while the brain and gills had a small proportion of common DE genes (specifically, 121 and 11  
310 common DE genes showing a rescue pattern in the brain and gills respectively and only two  
311 and one common DE genes in the intergeneration specific response in the brain and gills  
312 respectively (Supplementary Figure S3(b, c)).

313         The difference in transcriptional response between the two parental phenotypes was  
314 especially pronounced when considering genes showing an intergeneration-specific signature  
315 with offspring of tolerant phenotype having more DE genes with a much higher magnitude of  
316 gene expression changes ( $\log_2FC > 5$ ; Figure 3). Several functions such as acid-base regulation,  
317 signaling, transcription regulation, energy metabolism, and epigenetic processes were enriched  
318 in the intergeneration-specific treatment in all tissues only in the tolerant phenotype (Figure  
319 2(c)). Similarly, several functions were uniquely regulated only in offspring with tolerant  
320 parents when considering the overall effect of elevated CO<sub>2</sub> exposure independent of the length  
321 of exposure (Figure 2(a)). However, when considering genes whose expression levels returned  
322 to control levels due to parental conditioning to elevated CO<sub>2</sub>, there were more similarities in  
323 the underlying functional pathways between the two parental phenotypes for all three tissues  
324 (Figure 2(b)). Therefore, although there were some common transcriptional responses in  
325 offspring with sensitive and tolerant parents, overall offspring of tolerant parents showed a  
326 much stronger transcriptional response to elevated CO<sub>2</sub> in general and also had a stronger  
327 signature of intergenerational plasticity.



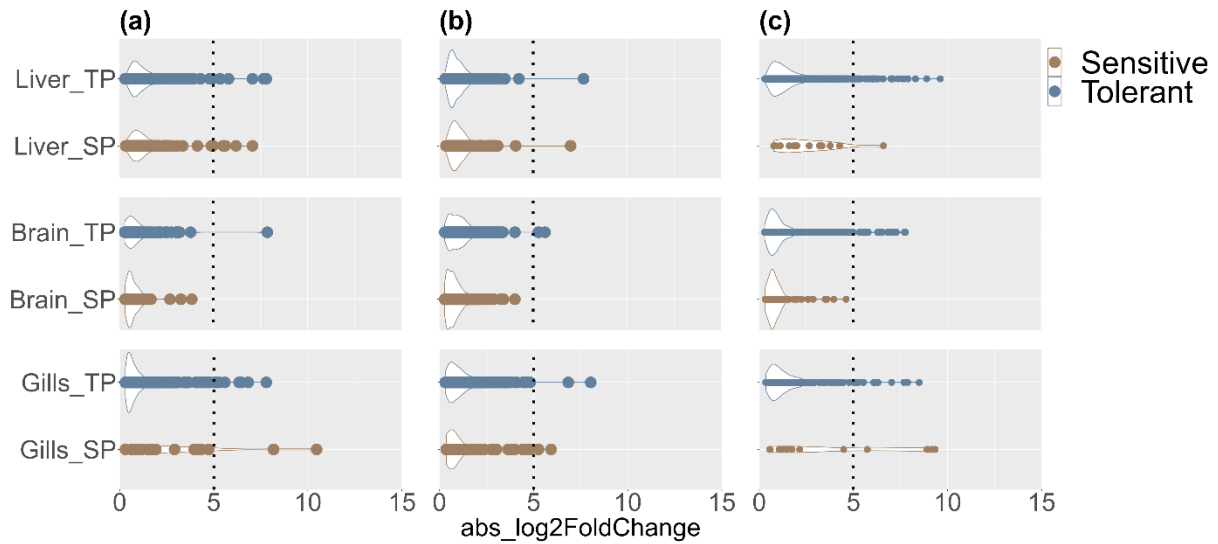

328

329 **Figure 3:** Log<sub>2</sub> fold change in expression of genes involved in (a) overall CO<sub>2</sub> response, (b)  
330 rescue pattern, and (c) intergenerational specific response across all three tissues. SP indicates  
331 samples with a sensitive parental phenotype and TP indicates samples with a tolerant parental  
332 phenotype.

333

334

## 335 Discussion

336 The transcriptional landscape of three key tissues exhibited shared and tissue-specific  
337 signatures driving intergenerational acclimation to elevated CO<sub>2</sub> in a marine fish. Specifically,  
338 we found that gills are critical in maintaining overall cellular homeostasis in elevated CO<sub>2</sub>  
339 treatments and that the brain and liver had the greatest signal of intergenerational acclimatory  
340 response. In fact, intergenerationally treated fish no longer showed molecular signatures of  
341 altered neural signaling in the brain and reduced capacity for energy production in the liver that  
342 were seen in the developmental (within generation) treatment. Indeed, a new complement of  
343 genes involved in metabolism were upregulated only in offspring of parents who were  
344 previously exposed to elevated CO<sub>2</sub> indicating improved capability for energy production at a  
345 systemic level. *A. polyacanthus* is known to have a highly plastic genome enabling it to respond  
346 and acclimate to environmental changes (Bernal et al., 2020; Kang et al., 2022) and our results  
347 show that this persists across generations potentially enabling this species to rapidly acclimate  
348 to the changing ocean environment.

349 Genes that are always differentially expressed in elevated CO<sub>2</sub> conditions regardless of  
350 the type of exposure are key genes in the general response to ocean acidification (OA). The  
351 gills and liver exhibited a higher transcriptional response in all elevated CO<sub>2</sub> treatments  
352 suggesting that these tissues play an important role in the overall response of the fish to elevated  
353 CO<sub>2</sub>. Genes involved in primary carbon metabolism, a process known to be altered under  
354 conditions of OA (Strader et al., 2020), were DE in both the gills and liver. This included genes  
355 in the tricarboxylic acid (TCA) cycle and the pentose phosphate pathway. Both these processes  
356 yield precursors for biosynthetic pathways and cofactors essential to maintain cellular  
357 homeostasis thereby influencing cellular processes beyond carbohydrate catabolism for energy  
358 (ATP) production (Gansemer et al., 2020). Therefore, the upregulation of these genes could  
359 indicate redirection of metabolic carbon fluxes to meet cellular demands for various cofactors

360 needed in the cellular stress response (CSR) pathways (Gansemer et al., 2020; Rokitta et al.,  
361 2012; Walsh & Milligan, 1993), which is often induced upon exposure to elevated CO<sub>2</sub> levels  
362 (Strader et al., 2020). In fact, various genes involved in CSR were found to be upregulated in  
363 the gills and brain. Therefore, there seems to be a systemic regulation of primary carbon  
364 metabolism in response to elevated CO<sub>2</sub> exposure to ensure sufficient production of precursors  
365 and cofactors needed for other biological processes.

366 Another key function we found to be required with elevated CO<sub>2</sub> is the immune  
367 response. Interestingly, genes involved in immune response were upregulated in the gills but  
368 downregulated in the liver indicating tissue-specific regulation of this function. Gills are one  
369 of the major surface tissues, which are continuously exposed to the external environment, and  
370 also serve as a first line of defense against potential infections (Harper & Wolf, 2009; Hu et al.,  
371 2023). Activation of immune responses has been previously observed under elevated CO<sub>2</sub>  
372 conditions which could be a preventive measure against opportunistic infections under CO<sub>2</sub>  
373 stress (De Souza et al., 2014; Machado et al., 2020). Hence the upregulation of genes involved  
374 in immune and stress response in the gills could be a protective mechanism to prevent cell  
375 damage caused by exposure to high CO<sub>2</sub>.

376 Parental exposure to altered environmental conditions can pre-acclimate the offspring  
377 transcriptome to these new conditions via intergenerational plasticity. The expression of genes  
378 involved in key functional pathways were altered in juvenile *A. polyacanthus* upon  
379 developmental exposure to elevated CO<sub>2</sub> but were restored to control levels in the  
380 intergenerationally treated fish. These included genes involved in metabolism, synaptic  
381 plasticity and signaling, and RNA processing and transcription regulation. Intergenerationally  
382 exposed fish did not show transcriptional signatures of metabolic depression that was observed  
383 upon developmental CO<sub>2</sub> exposure in the liver, the major organ for metabolism. Specifically,  
384 fish exposed to elevated CO<sub>2</sub> during development, but not intergenerationally, exhibited

385 reduced capacity for energy production marked by downregulation of lipid and glucose  
386 metabolism, and genes involved in iron-sulfur (Fe-S) cluster assembly, which function as  
387 cofactors in the mitochondrial respiratory chain. In addition, there was upregulation of PCK1,  
388 a gluconeogenic enzyme (Yu et al., 2021) and AGL, involved in glycogen breakdown (Ni et  
389 al., 2022), which could indicate glucose shortage for energy production when the offspring are  
390 only exposed to elevated CO<sub>2</sub> within their lifetime. Metabolic suppression is a commonly  
391 observed physiological response to CO<sub>2</sub> stress (Strader et al., 2020), however, the expression  
392 levels of the above-mentioned genes returned to control levels with previous parental exposure,  
393 revealing that parental conditioning to elevated CO<sub>2</sub> restores the metabolic capacity of the  
394 offspring.

395 Furthermore, the expression of genes involved in synaptic plasticity and calcium  
396 channel activity were altered in the developmental treatment, predominantly in the brain, but  
397 were similar to control levels in the intergenerationally treated fish. Exposure to OA conditions  
398 has been shown to affect neural plasticity and neurogenesis in some fish species, which could  
399 result in changes in neural circuitry and signaling (Costa et al., 2022; Lai et al., 2017). While  
400 neural plasticity could facilitate increased flexibility to environmental changes (Ebbesson &  
401 Braithwaite, 2012), it could result in behavioural alterations that have been observed in fish  
402 exposed to OA conditions (Schunter et al., 2019). Increased GABAergic signaling is a  
403 commonly observed within-generation response to elevated CO<sub>2</sub> in *A. polyacanthus* (Schunter  
404 et al., 2018) and a similar increase in neural signaling pathways was found in the olfactory  
405 epithelium of *D. labrax* even after prolonged transgenerational OA exposure for two  
406 generations (Cohen-Rengifo et al. 2022). The restoration of OA induced changes in neural  
407 signaling processes with previous parental exposure to elevated CO<sub>2</sub> could indicate elevated  
408 intergenerational plasticity of *A. polyacanthus* compared to other species. Synaptic plasticity  
409 is regulated by the cytoskeleton (Gordon-Weeks & Fournier, 2014; Zapara et al., 2000) and

410 intergenerationally treated fish did not show changes in expression of various cytoskeleton and  
411 cell adhesion genes seen in the developmental treatment. Therefore, intergenerational CO<sub>2</sub>  
412 exposure restores the dynamic equilibrium of cytoskeletal proteins, thereby re-establishing  
413 synaptic signaling processes to control levels.

414         Transcriptional regulatory elements were identified to be key in regulating the response  
415 to elevated CO<sub>2</sub>. Transcription factors and RNA-mediated gene silencers mainly mediated  
416 plasticity in the within-generation response to elevated CO<sub>2</sub>. Changes in the external  
417 environment can trigger reprogramming of transcriptional networks resulting in dynamic  
418 regulation of gene expression (Swift & Coruzzi, 2017) as also suggested in wild fish  
419 populations naturally exposed to elevated CO<sub>2</sub> (Petit-Marty et al., 2021). Therefore, these  
420 regulatory genes could play a key role in developmental plastic responses to elevated  
421 environmental CO<sub>2</sub> levels, however, these are no longer needed in intergenerationally treated  
422 fish. The overall “rescue” of various key functional pathways upon intergenerational exposure  
423 to elevated CO<sub>2</sub> suggests parental priming of the offspring transcriptome enabling acclimation  
424 of future generations to OA.

425         We also found a new complement of genes to be differentially expressed only when the  
426 parents are exposed to the same elevated CO<sub>2</sub> condition as their offspring, which could further  
427 facilitate acclimation of the offspring enabling them to better cope with an elevated CO<sub>2</sub>  
428 environment. Such intergenerational specific transcriptional signature was observed in genes  
429 involved in ion transport resulting in bicarbonate retention in the brain and gills. Increasing  
430 internal bicarbonate ion concentrations is a commonly observed compensatory response in fish  
431 to buffer acid-base disturbance caused by exposure to elevated CO<sub>2</sub> levels (Heuer & Grosell,  
432 2014). Differential expression (DE) of bicarbonate transporters in the intergenerationally  
433 treated fish suggests that parental conditioning enables the offspring to more effectively buffer  
434 pH changes (Brauner et al., 2019; Chen et al., 2009; Choi, 2012.; Esbaugh, 2017). Furthermore,

435 changes in potassium channel activity enables the fish to sense pH disturbances (Hibino et al.,  
436 2010; Qin et al., 2010) and in turn initiate compensatory responses to maintain homeostasis.  
437 Therefore, intergenerational CO<sub>2</sub> exposure could have resulted in transcriptional  
438 rearrangements of ion transporters in the offspring, especially in the brain and gills, to maintain  
439 pH homeostasis primarily by bicarbonate retention rather than acid extrusion. While changes in  
440 ion channel activity can be an efficient mechanism to buffer pH changes and prevent acidosis  
441 in elevated CO<sub>2</sub> conditions, it is an energy demanding process (Ishimatsu et al., 2005; Auffret  
442 et al., 2023). However, parental conditioning to elevated CO<sub>2</sub> also increased the offspring's  
443 capacity of energy metabolism. Transcriptional signatures indicating metabolic suppression  
444 observed in the developmental treatment was no longer observed in the intergenerationally  
445 treated fish. In fact, when considering only the intergeneration-specific transcriptional response,  
446 metabolic processes including mitochondrial electron transport were upregulated in all three  
447 tissues, but particularly in the liver. Exposure to elevated CO<sub>2</sub> for prolonged periods results in  
448 increased energetic costs (Araújo et al. 2018; Schunter et al. 2016, 2021; Tsang et al. 2020)  
449 and while liver is the main tissue involved in metabolism (Auffret et al., 2023), the shared  
450 upregulation of metabolic genes in all three tissues suggests an increase in metabolic processes  
451 in a whole-body context. Therefore, parental conditioning to elevated CO<sub>2</sub> may enable the  
452 offspring to meet the energetic demands associated with living in a high CO<sub>2</sub> environment.

453 One of the mechanisms by which parental experiences influence the next generation is  
454 by the transfer of epigenetic factors (Perez & Lehner, 2019). Here, we found genes involved in  
455 chromatin remodeling to be DE exclusively in the liver. These genes are known to affect  
456 chromatin compaction and accessibility thereby controlling fundamental cellular processes  
457 such as transcription, DNA damage response and repair, cellular proliferation, and apoptosis  
458 (Allen et al., 2013; Jacquet et al., 2016; Kalakonda et al., 2008; Nady et al., 2012; Torchy et  
459 al., 2015). Epigenetic mechanisms have been reported to play a role in plasticity and

460 acclimation to environmental changes including elevated temperature and CO<sub>2</sub> levels  
461 (Anastasiadi et al., 2017; Fuxjäger et al., 2019; Lighten et al., 2016; Ryu et al., 2018; Veilleux  
462 et al., 2015). This could be the case here with parental exposure to elevated CO<sub>2</sub> conditions  
463 influencing the offsprings' liver epigenome via remodeling the chromatin thereby regulating  
464 the expression of genes involved in diverse biological processes.

465 Parental behavioural phenotype has been shown to influence the offspring brain  
466 transcriptional response to elevated CO<sub>2</sub> in *A. polyacanthus* (Monroe et al., 2021), with  
467 behavioural tolerance being heritable (Welch & Munday, 2017). We observed a stronger  
468 transcriptional response to elevated CO<sub>2</sub> exposure with higher number of DE genes and larger  
469 fold changes in the offspring of tolerant parental phenotype across all three tissues. Selection  
470 experiments have indicated a genetic basis for individual variation in OA induced responses in  
471 a variety of animals (Langer et al. 2009; Parker et al., 2011; Pistevos et al. 2011; Sunday et al.  
472 2011), including the behavioural phenotype to chemical alarm cues in elevated CO<sub>2</sub> in *A.*  
473 *polyacanthus* (Lehmann et al. 2022). This intraspecific variation in organismal response is key  
474 in driving future adaptive evolution. Here, we found that offspring of parents with a tolerant  
475 behavioural phenotype had an increased capacity for intergenerational plasticity in their  
476 transcriptome, which in turn suggests greater adaptive potential to future ocean acidification  
477 conditions.

478 In this study we used a systematic approach by incorporating multiple factors including  
479 parental behavioral variability, parental environment, and multiple tissues to provide greater  
480 predictive power in estimating the adaptive potential of species to future ocean conditions. We  
481 determine the extent of transcriptional reprogramming induced by elevated CO<sub>2</sub> in three major  
482 tissue groups and reveal cross-tissue communication facilitating acclimation to future OA  
483 conditions. The gills were especially sensitive to all elevated CO<sub>2</sub> treatments regardless of the  
484 length of exposure. Parental exposure to elevated CO<sub>2</sub> conditions had a substantial influence

485 on the offspring transcriptome, with key functional pathways that were altered in the  
486 developmental treatment being “rescued” in the intergenerationally exposed fish in the brain  
487 and liver. Furthermore, intergeneration specific regulation revealed how previous parental  
488 conditioning to OA can mediate reprogramming of the offspring transcriptome, including  
489 energy metabolism and acid-base homeostasis in all tissues and epigenetic-related genes in the  
490 liver. Overall, we found that both parental behavioural phenotype as well as the parental  
491 environment influence offspring transcriptome in response to elevated CO<sub>2</sub>. Our study reveals  
492 how intergenerational plasticity is facilitated from a whole-organism perspective and illustrates  
493 how transcriptional changes across multiple tissues integrate to drive potential adaptation to  
494 the changing ocean chemistry.

495

496



497 **Author contributions**

498 The experiment was designed and run by MJW and PLM. Molecular lab work was performed  
499 by CS and sequenced by TR. SS carried out the transcriptome expression analysis with input  
500 from CS. SS lead the writing of the manuscript with input from CS and all authors read, edited  
501 and approved the final manuscript.

502 **Ethics**

503 Sample collection was carried out following all institutional and national law guidelines. The  
504 experiment was completed under James Cook University ethics approval A1828.

505 **Competing financial interests**

506 All authors declare they have no competing interests.

507 **Acknowledgements**

508 CS and SS were supported through the HKU start-up to CS. PLM was supported by the ARC  
509 Centre of Excellence for Coral Reef Studies and TR was supported by Okinawa Institute of  
510 Science and Technology (OIST).

511 **Data availability**

512 The brain RNA-Seq raw sequences are deposited in NCBI under BioProject ID PRJNA311159.  
513 The gills and liver RNA-Seq raw sequences are deposited in NCBI under BioProject ID  
514 PRJNA989422  
515 ([https://dataview.ncbi.nlm.nih.gov/object/PRJNA989422?reviewer=q3n0q75hbbf2p1v85n0h  
516 e3uv86](https://dataview.ncbi.nlm.nih.gov/object/PRJNA989422?reviewer=q3n0q75hbbf2p1v85n0he3uv86)).

517

## 518 **References**

- 519 Allan, B. J. M., Miller, G. M., McCormick, M. I., Domenici, P., & Munday, P. L. (2014).  
520 Parental effects improve escape performance of juvenile reef fish in a high-CO<sub>2</sub> world.  
521 *Proceedings of the Royal Society B: Biological Sciences*, 281(1777).  
522 <https://doi.org/10.1098/RSPB.2013.2179>
- 523 Allen, H. F., Wade, P. A., & Kutateladze, T. G. (2013). The NuRD architecture. *Cellular and*  
524 *Molecular Life Sciences*, 70, 3513-3524.
- 525 Anastasiadi, D., Díaz, N., & Piferrer, F. (2017). Small ocean temperature increases elicit  
526 stage-dependent changes in DNA methylation and gene expression in a fish, the  
527 European sea bass. *Scientific Reports*, 7(1), 12401. [https://doi.org/10.1038/s41598-017-](https://doi.org/10.1038/s41598-017-10861-6)  
528 10861-6
- 529 Andrews, S. (2010). FastQC: a quality control tool for high throughput sequence data.
- 530 Araújo, J. E., Madeira, D., Vitorino, R., Repolho, T., Rosa, R., & Diniz, M. (2018). Negative  
531 synergistic impacts of ocean warming and acidification on the survival and proteome of  
532 the commercial sea bream, *Sparus aurata*. *Journal of Sea Research*, 139, 50–61.  
533 <https://doi.org/10.1016/j.seares.2018.06.011>
- 534 Auffret, P., Servili, A., Gonzalez, A. A., Fleury, M. L., Mark, F. C., & Mazurais, D. (2023).  
535 Transgenerational exposure to ocean acidification impacts the hepatic transcriptome of  
536 European sea bass (*Dicentrarchus labrax*). *BMC genomics*, 24(1), 1-11.
- 537 Bernal, M. A., Schunter, C., Lehmann, R., Lightfoot, D. J., Allan, B. J. M., Veilleux, H. D.,  
538 Rummer, J. L., Munday, P. L., & Ravasi, T. (2020). Species-specific molecular  
539 responses of wild coral reef fishes during a marine heatwave. *Science Advances*, 6(12).  
540 <https://doi.org/10.1126/sciadv.aay3423>
- 541 Bolger, A. M., Lohse, M., & Usadel, B. (2014). Trimmomatic: a flexible trimmer for Illumina  
542 sequence data. *Bioinformatics*, 30(15), 2114–2120.  
543 <https://doi.org/10.1093/BIOINFORMATICS/BTU170>
- 544 Brauner, C. J., Shartau, R. B., Damsgaard, C., Esbaugh, A. J., Wilson, R. W., & Grosell, M.  
545 (2019). Acid-base physiology and CO<sub>2</sub> homeostasis: Regulation and compensation in  
546 response to elevated environmental CO<sub>2</sub>. In *Fish Physiology* (Vol. 37, pp. 69–132).  
547 Academic Press. <https://doi.org/10.1016/BS.FP.2019.08.003>
- 548 Chen, J. H., Cai, Z., & Sheppard, D. N. (2009). Direct Sensing of Intracellular pH by the Cystic  
549 Fibrosis Transmembrane Conductance Regulator (CFTR) Cl Channel\*♦. *Journal of*  
550 *Biological Chemistry*, 284(51), 35495-35506. <https://doi.org/10.1074/jbc.M109.072678>
- 551 Choi, I. (2012). SLC4A transporters. In *Current topics in membranes* (Vol. 70, pp. 77-103).  
552 Academic Press.
- 553 Costa, R. A., Olvera, A., Power, D. M., & Velez, Z. (2022). Ocean acidification affects the  
554 expression of neuroplasticity and neuromodulation markers in seabream. *Biology Open*,  
555 11(3). <https://doi.org/10.1242/bio.059073>
- 556 Crespel, A., Anttila, K., Lelièvre, P., Quazuguel, P., Le Bayon, N., Zambonino-Infante, J. L.,  
557 Chabot, D., & Claireaux, G. (2019). Long-term effects of ocean acidification upon  
558 energetics and oxygen transport in the European sea bass (*Dicentrarchus labrax*,  
559 Linnaeus). *Marine Biology*, 166(9), 116. <https://doi.org/10.1007/s00227-019-3562-9>

- 560 De Souza, K. B., Jutfelt, F., Kling, P., Förlin, L., & Sturve, J. (2014). Effects of Increased  
561 CO<sub>2</sub> on Fish Gill and Plasma Proteome. *PLOS ONE*, 9(7), e102901.  
562 <https://doi.org/10.1371/JOURNAL.PONE.0102901>
- 563 Deigweiher, K., Hirse, T., Bock, C., Lucassen, M., & Pörtner, H. O. (2010). Hypercapnia  
564 induced shifts in gill energy budgets of Antarctic notothenioids. *Journal of Comparative*  
565 *Physiology B*, 180(3), 347–359. <https://doi.org/10.1007/s00360-009-0413-x>
- 566 Deigweiher, K., Koschnick, N., Pörtner, H. O., & Lucassen, M. (2008). Acclimation of ion  
567 regulatory capacities in gills of marine fish under environmental hypercapnia. *American*  
568 *Journal of Physiology-Regulatory, Integrative and Comparative Physiology*, 295(5),  
569 R1660–R1670. <https://doi.org/10.1152/ajpregu.90403.2008>
- 570 Donelson, J. M., Munday, P. L., McCormick, M. I., & Pitcher, C. R. (2012). Rapid  
571 transgenerational acclimation of a tropical reef fish to climate change. *Nature Climate*  
572 *Change*, 2(1), 30–32. <https://doi.org/10.1038/nclimate1323>
- 573 Ebbesson, L. O. E., & Braithwaite, V. A. (2012). Environmental effects on fish neural  
574 plasticity and cognition. *Journal of Fish Biology*, 81(7), 2151–2174.  
575 <https://doi.org/10.1111/j.1095-8649.2012.03486.x>
- 576 Esbaugh, A. J. (2017). Physiological implications of ocean acidification for marine fish:  
577 emerging patterns and new insights. *Journal of Comparative Physiology B*, 188(1), 1–  
578 13. <https://doi.org/10.1007/S00360-017-1105-6>
- 579 Frommel, A. Y., Hermann, B. T., Michael, K., Lucassen, M., Clemmesen, C., Hanel, R., &  
580 Reusch, T. B. H. (2020). Differential gene expression patterns related to lipid  
581 metabolism in response to ocean acidification in larvae and juveniles of Atlantic cod.  
582 *Comparative Biochemistry and Physiology Part A: Molecular & Integrative Physiology*,  
583 247, 110740. <https://doi.org/10.1016/j.cbpa.2020.110740>
- 584 Fuxjäger, L., Wanzenböck, S., Ringler, E., Wegner, K. M., Ahnelt, H., & Shama, L. N. S.  
585 (2019). Within-generation and transgenerational plasticity of mate choice in oceanic  
586 stickleback under climate change. *Philosophical Transactions of the Royal Society B:*  
587 *Biological Sciences*, 374(1768), 20180183. <https://doi.org/10.1098/rstb.2018.0183>
- 588 Gansemer, E. R., McCommis, K. S., Martino, M., King-McAlpin, A. Q., Potthoff, M. J.,  
589 Finck, B. N., Taylor, E. B., & Rutkowski, D. T. (2020). NADPH and Glutathione Redox  
590 Link TCA Cycle Activity to Endoplasmic Reticulum Homeostasis. *IScience*, 23(5),  
591 101116. <https://doi.org/10.1016/J.ISCI.2020.101116>
- 592 Gordon-Weeks, P. R., & Fournier, A. E. (2014). Neuronal cytoskeleton in synaptic plasticity  
593 and regeneration. *Journal of Neurochemistry*, 129(2), 206–212.  
594 <https://doi.org/10.1111/JNC.12502>
- 595 Gräns, A., Jutfelt, F., Sandblom, E., Jönsson, E., Wiklander, K., Seth, H., Olsson, C., Dupont,  
596 S., Ortega-Martinez, O., Einarsdottir, I., Björnsson, B. T., Sundell, K., & Axelsson, M.  
597 (2014). Aerobic scope fails to explain the detrimental effects on growth resulting from  
598 warming and elevated CO<sub>2</sub> in Atlantic halibut. *Journal of Experimental Biology*, 217(5),  
599 711–717. <https://doi.org/10.1242/jeb.096743>
- 600 Grosell M., Munday P. L., Farrell A. P., Brauner C. J. (2019). Fish Physiology Volume 37:  
601 Carbon Dioxide (Amsterdam: Elsevier).
- 602 Harper, C., & Wolf, J. C. (2009). Morphologic Effects of the Stress Response in Fish. *ILAR*

- 603 *Journal*, 50(4), 387–396. <https://doi.org/10.1093/ILAR.50.4.387>
- 604 Heuer, R. M., & Grosell, M. (2014). Physiological impacts of elevated carbon dioxide and  
605 ocean acidification on fish. *American Journal of Physiology - Regulatory Integrative*  
606 *and Comparative Physiology*, 307(9), R1061–R1084.  
607 <https://doi.org/10.1152/ajpregu.00064.2014>
- 608 Hibino, H., Inanobe, A., Furutani, K., Murakami, S., Findlay, I., & Kurachi, Y. (2010).  
609 Inwardly rectifying potassium channels: Their structure, function, and physiological  
610 roles. *Physiological Reviews*, 90(1), 291–366.  
611 <https://doi.org/10.1152/physrev.00021.2009>
- 612 Hu, X., Bai, J., Liu, R., & Lv, A. (2023). Comprehensive transcriptomics and proteomics  
613 analysis of *Carassius auratus* gills in response to *Aeromonas hydrophila*. *Fish and*  
614 *Shellfish Immunology Reports*, 4, 100077.  
615 <https://doi.org/10.1016/J.FSIREP.2022.100077>
- 616 Huang, R., Ding, J., Gao, K., De Carvalho, M. H. C., Tirichine, L., Bowler, C., & Lin, X.  
617 (2019). A potential role for epigenetic processes in the acclimation response to elevated  
618 pCO<sub>2</sub> in the model diatom *Phaeodactylum tricornutum*. *Frontiers in Microbiology*, 9,  
619 3342. <https://doi.org/10.3389/fmicb.2018.03342>
- 620 Ishimatsu, A., Hayashi, M., Lee, K. S., Kikkawa, T., & Kita, J. (2005). Physiological effects  
621 on fishes in a high-CO<sub>2</sub> world. *Journal of Geophysical Research: Oceans*, 110(C9), 1–8.  
622 <https://doi.org/10.1029/2004JC002564>
- 623 Kang, J., Nagelkerken, I., Rummer, J. L., Rodolfo-Metalpa, R., Munday, P. L., Ravasi, T., &  
624 Schunter, C. (2022). Rapid evolution fuels transcriptional plasticity to ocean  
625 acidification. *Global Change Biology*, 28(9), 3007–3022.  
626 <https://doi.org/10.1111/GCB.16119>
- 627 Kim, D., Paggi, J. M., Park, C., Bennett, C., & Salzberg, S. L. (2019). Graph-based genome  
628 alignment and genotyping with HISAT2 and HISAT-genotype. *Nature Biotechnology*  
629 37(8), 907–915. <https://doi.org/10.1038/s41587-019-0201-4>
- 630 Lai, F., Fagernes, C. E., Bernier, N. J., Miller, G. M., Munday, P. L., Jutfelt, F., & Nilsson,  
631 G. E. (2017). Responses of neurogenesis and neuroplasticity related genes to elevated  
632 CO<sub>2</sub> levels in the brain of three teleost species. *Biology Letters*, 13(8).  
633 <https://doi.org/10.1098/rsbl.2017.0240>
- 634 Lee, D. W., Song, J. A., Park, H.-S., & Choi, C. Y. (2021). Circadian Rhythm Disturbances  
635 Due to Exposure to Acidified Conditions and Different Photoperiods in Juvenile Olive  
636 Flounder (*Paralichthys olivaceus*). *Ocean Science Journal*, 56(2), 198–206.  
637 <https://doi.org/10.1007/s12601-021-00018-y>
- 638 Lee, Y. H., Kang, H. M., Kim, M. S., Lee, J. S., Wang, M., Hagiwara, A., Jeong, C. B., &  
639 Lee, J. S. (2020). Multigenerational Mitigating Effects of Ocean Acidification on *In*  
640 *Vivo* Endpoints, Antioxidant Defense, DNA Damage Response, and Epigenetic  
641 Modification in an Asexual Monogonont Rotifer. *Environmental Science & Technology*,  
642 54(13), 7858–7869. <https://doi.org/10.1021/acs.est.0c01438>
- 643 Lee, Y. H., Kim, M. S., Wang, M., Bhandari, R. K., Park, H. G., Wu, R. S. S., & Lee, J. S.  
644 (2022). Epigenetic plasticity enables copepods to cope with ocean acidification. *Nature*  
645 *Climate Change*, 12(10), 918–927. <https://doi.org/10.1038/s41558-022-01477-4>

- 646 Lehmann, R., Schunter, C., Welch, M. J., Arold, S. T., Nilsson, G. E., Tegner, J. N., Munday,  
647 P. L., & Ravasi, T. (2022). Genetic architecture of behavioural resilience to ocean  
648 acidification. *BioRxiv*, 2022.10.18.512656. <https://doi.org/10.1101/2022.10.18.512656>
- 649 Liao, Y., Smyth, G. K., & Shi, W. (2014). featureCounts: an efficient general purpose  
650 program for assigning sequence reads to genomic features. *Bioinformatics*, 30(7), 923–  
651 930. <https://doi.org/10.1093/BIOINFORMATICS/BTT656>
- 652 Lighten, J., Incarnato, D., Ward, B. J., van Oosterhout, C., Bradbury, I., Hanson, M., &  
653 Bentzen, P. (2016). Adaptive phenotypic response to climate enabled by epigenetics in a  
654 K-strategy species, the fish *Leucoraja ocellata* (Rajidae). *Royal Society Open Science*,  
655 3(10), 160299. <https://doi.org/10.1098/rsos.160299>
- 656 Love, M. I., Huber, W., & Anders, S. (2014). Moderated estimation of fold change and  
657 dispersion for RNA-seq data with DESeq2. *Genome Biology*, 15(12), 1–21.  
658 <https://doi.org/10.1186/s13059-014-0550-8>
- 659 Machado, M., Arenas, F., Svendsen, J. C., Azeredo, R., Pfeifer, L. J., Wilson, J. M., &  
660 Costas, B. (2020). Effects of Water Acidification on Senegalese Sole *Solea senegalensis*  
661 Health Status and Metabolic Rate: Implications for Immune Responses and Energy Use.  
662 *Frontiers in Physiology*, 11, 26. <https://doi.org/10.3389/FPHYS.2020.00026/BIBTEX>
- 663 Miller, G. M., Watson, S. A., Donelson, J. M., McCormick, M. I., & Munday, P. L. (2012).  
664 Parental environment mediates impacts of increased carbon dioxide on a coral reef fish.  
665 *Nature Climate Change*, 2(12), 858–861. <https://doi.org/10.1038/NCLIMATE1599>
- 666 Monroe, A. A., Schunter, C., Welch, M. J., Munday, P. L., & Ravasi, T. (2021). Molecular  
667 basis of parental contributions to the behavioural tolerance of elevated pCO<sub>2</sub> in a coral  
668 reef fish. *Proceedings of the Royal Society B: Biological Sciences*, 288(1964).  
669 <https://doi.org/10.1098/rspb.2021.1931>
- 670 Munday, P. L. (2014). Transgenerational acclimation of fishes to climate change and ocean  
671 acidification. *F1000Prime Reports*, 6. <https://doi.org/10.12703/P6-99>
- 672 Munday, P. L., McCormick, M. I., Meekan, M., Dixon, D. L., Watson, S. A., Chivers, D. P.,  
673 & Ferrari, M. C. O. (2013). Selective mortality associated with variation in CO<sub>2</sub>  
674 tolerance in a marine fish. *Ocean Acidification*, 1, 1–5. [https://doi.org/10.2478/OAC-  
675 2012-0001](https://doi.org/10.2478/OAC-2012-0001)
- 676 Nagelkerken, I., Allan, B. J., Booth, D. J., Donelson, J. M., Edgar, G. J., Ravasi, T., Rummer,  
677 J. L., Vergés, A., & Mellin, C. (2023). The effects of climate change on the ecology of  
678 fishes. *PLOS Climate*, 2(8), e0000258.
- 679 Ni, J., Zhu, P., Mo, Q., Luo, W., Du, Z., Jiang, J., Yang, S., Zhao, L., Gong, Q., & Wang, Y.  
680 (2022). Dynamic Transcriptomic Profiling During Liver Development in Schizothorax  
681 Prenanti. *Frontiers in Physiology*, 13, 1397.  
682 <https://doi.org/10.3389/FPHYS.2022.928858/BIBTEX>
- 683 OmicsBox – Bioinformatics Made Easy, BioBam Bioinformatics, March 3, 2019,  
684 <https://www.biobam.com/omicsbox>
- 685 Parker, L. M., Ross, P. M., & O'Connor, W. A. (2011). Populations of the Sydney rock  
686 oyster, *Saccostrea glomerata*, vary in response to ocean acidification. *Marine Biology*,  
687 158, 689–697.
- 688 Perez, M. F., & Lehner, B. (2019). Intergenerational and transgenerational epigenetic

- 689 inheritance in animals. *Nature Cell Biology*, 21(2), 143–151.  
690 <https://doi.org/10.1038/s41556-018-0242-9>
- 691 Petit-Marty, N., Nagelkerken, I., Connell, S. D., & Schunter, C. (2021). Natural CO<sub>2</sub> seeps  
692 reveal adaptive potential to ocean acidification in fish. *Evolutionary Applications*, 14(7),  
693 1794–1806. <https://doi.org/10.1111/eva.13239>
- 694 Pimentel, M., Pegado, M., Repolho, T., & Rosa, R. (2014). Impact of ocean acidification in  
695 the metabolism and swimming behavior of the dolphinfish (*Coryphaena hippurus*) early  
696 larvae. *Marine Biology*, 161(3), 725–729. <https://doi.org/10.1007/s00227-013-2365-7>
- 697 Pörtner, H. O., Roberts, D. C., Masson-Delmotte, V., Zhai, P., Tignor, M., Poloczanska, E.,  
698 & Weyer, N. M. (2019). The ocean and cryosphere in a changing climate. *IPCC special*  
699 *report on the ocean and cryosphere in a changing climate*, 1155.
- 700 Qin, Z., Lewis, J. E., & Perry, S. F. (2010). Zebrafish (*Danio rerio*) gill neuroepithelial cells  
701 are sensitive chemoreceptors for environmental CO<sub>2</sub>. *The Journal of Physiology*, 588(5),  
702 861-872. <https://doi.org/10.1113/JPHYSIOL.2009.184739>
- 703 R Core Team. (2021). *R: A language and environment for statistical computing*. R  
704 Foundation for Statistical Computing, Vienna, Austria. <https://www.r-project.org/>.
- 705 Robertson, D. R. (1973). Field Observations on the Reproductive Behaviour of a Pomacentrid  
706 Fish, *Acanthochromis polyacanthus*. *Zeitschrift Für Tierpsychologie*, 32(3), 319–324.  
707 <https://doi.org/10.1111/j.1439-0310.1973.tb01108.x>
- 708 Rokitta, S. D., John, U., & Rost, B. (2012). Ocean Acidification Affects Redox-Balance and  
709 Ion-Homeostasis in the Life-Cycle Stages of *Emiliana huxleyi*. *PLOS ONE*, 7(12),  
710 e52212. <https://doi.org/10.1371/JOURNAL.PONE.0052212>
- 711 Rummer, J. L., Stecyk, J. A. W., Couturier, C. S., Watson, S.-A., Nilsson, G. E., & Munday,  
712 P. L. (2013). Elevated CO<sub>2</sub> enhances aerobic scope of a coral reef fish. *Conservation*  
713 *Physiology*, 1(1), cot023. <https://doi.org/10.1093/conphys/cot023>
- 714 Ryu, T., Veilleux, H. D., Donelson, J. M., Munday, P. L., & Ravasi, T. (2018). The  
715 epigenetic landscape of transgenerational acclimation to ocean warming. *Nature Climate*  
716 *Change*, 8(6), 504–509. <https://doi.org/10.1038/s41558-018-0159-0>
- 717 Schade, F. M., Clemmesen, C., Wegner, M., & Wegener, A. (2014). Within-and  
718 transgenerational effects of ocean acidification on life history of marine three-spined  
719 stickleback (*Gasterosteus aculeatus*). *Marine Biology*, 161(7), 1667–1676.  
720 <https://doi.org/10.1007/s00227-014-2450-6>
- 721 Schunter, C., Jarrold, M. D., Munday, P. L., & Ravasi, T. (2021). Diel pCO<sub>2</sub> fluctuations alter  
722 the molecular response of coral reef fishes to ocean acidification conditions. *Molecular*  
723 *Ecology*, 30(20), 5105–5118. <https://doi.org/10.1111/mec.16124>
- 724 Schunter, C., Ravasi, T., Munday, P. L., & Nilsson, G. E. (2019). Neural effects of elevated  
725 CO<sub>2</sub> in fish may be amplified by a vicious cycle. *Conservation Physiology*, 7(1).  
726 <https://doi.org/10.1093/CONPHYS/COZ100>
- 727 Schunter, C., Welch, M. J., Nilsson, G. E., Rummer, J. L., Munday, P. L., & Ravasi, T.  
728 (2018). An interplay between plasticity and parental phenotype determines impacts of  
729 ocean acidification on a reef fish. *Nature Ecology & Evolution*, 2(2), 334–342.  
730 <https://doi.org/10.1038/s41559-017-0428-8>

- 731 Schunter, C., Welch, M. J., Ryu, T., Zhang, H., Berumen, M. L., Nilsson, G. E., Munday, P.  
732 L., & Ravasi, T. (2016). Molecular signatures of transgenerational response to ocean  
733 acidification in a species of reef fish. *Nature Climate Change*, 6(11), 1014–1018.  
734 <https://doi.org/10.1038/nclimate3087>
- 735 Stiasny, M. H., Mittermayer, F. H., Göttler, G., Bridges, C. R., Falk-Petersen, I. B.,  
736 Puvanendran, V., Mortensen, A., Reusch, T. B. H., & Clemmesen, C. (2018). Effects of  
737 parental acclimation and energy limitation in response to high CO<sub>2</sub> exposure in Atlantic  
738 cod. *Scientific Reports*, 8(1), 1–8. <https://doi.org/10.1038/s41598-018-26711-y>
- 739 Strader, M. E., Wong, J. M., & Hofmann, G. E. (2020). Ocean acidification promotes broad  
740 transcriptomic responses in marine metazoans: A literature survey. *Frontiers in Zoology*,  
741 17(1), 1–23. <https://doi.org/10.1186/s12983-020-0350-9>
- 742 Swift, J., & Coruzzi, G. M. (2017). A matter of time — How transient transcription factor  
743 interactions create dynamic gene regulatory networks. *Biochimica et Biophysica Acta*  
744 (*BBA*) - *Gene Regulatory Mechanisms*, 1860(1), 75–83.  
745 <https://doi.org/10.1016/j.bbagr.2016.08.007>
- 746 Torchy, M. P., Hamiche, A., & Klaholz, B. P. (2015). Structure and function insights into the  
747 NuRD chromatin remodeling complex. *Cellular and Molecular Life Sciences*, 72, 2491-  
748 2507.
- 749 Tsang, H. H., Welch, M. J., Munday, P. L., Ravasi, T., & Schunter, C. (2020). Proteomic  
750 Responses to Ocean Acidification in the Brain of Juvenile Coral Reef Fish. *Frontiers in*  
751 *Marine Science*, 7, 605. <https://doi.org/10.3389/FMARS.2020.00605/BIBTEX>
- 752 Turner, B. M. (2009). Epigenetic responses to environmental change and their evolutionary  
753 implications. *Philosophical Transactions of the Royal Society B: Biological Sciences*,  
754 364(1534), 3403–3418. <https://doi.org/10.1098/rstb.2009.0125>
- 755 Veilleux, H. D., Ryu, T., Donelson, J. M., van Herwerden, L., Seridi, L., Ghosheh, Y.,  
756 Berumen, M. L., Leggat, W., Ravasi, T., & Munday, P. L. (2015). Molecular processes  
757 of transgenerational acclimation to a warming ocean. *Nature Climate Change*, 5(12),  
758 1074–1078. <https://doi.org/10.1038/nclimate2724>
- 759 Walsh, P. J., & Milligan, C. L. (1993). Roles of Buffering Capacity and Pentose Phosphate  
760 Pathway Activity in the Gas Gland of the Gulf Toadfish *Opsanus Beta*. *Journal of*  
761 *Experimental Biology*, 176(1), 311–316. <https://doi.org/10.1242/JEB.176.1.311>
- 762 Welch, M. J., & Munday, P. L. (2017). Heritability of behavioural tolerance to high CO<sub>2</sub> in a  
763 coral reef fish is masked by nonadaptive phenotypic plasticity. *Evolutionary*  
764 *Applications*, 10(7), 682–693. <https://doi.org/10.1111/eva.12483>
- 765 Williams, C. R., Dittman, A. H., McElhany, P., Busch, D. S., Maher, M. T., Bammler, T. K.,  
766 MacDonald, J. W., & Gallagher, E. P. (2019). Elevated CO<sub>2</sub> impairs olfactory-mediated  
767 neural and behavioral responses and gene expression in ocean-phase coho salmon  
768 (*Oncorhynchus kisutch*). *Global Change Biology*, 25(3), 963–977.  
769 <https://doi.org/10.1111/gcb.14532>
- 770 Wood, D. E., & Salzberg, S. L. (2014). Kraken: Ultrafast metagenomic sequence  
771 classification using exact alignments. *Genome Biology*, 15(3).  
772 <https://doi.org/10.1186/gb-2014-15-3-r46>
- 773 Yu, S., Meng, S., Xiang, M., & Ma, H. (2021). Phosphoenolpyruvate carboxykinase in cell

- 774 metabolism: Roles and mechanisms beyond gluconeogenesis. *Molecular Metabolism*,  
775 53. <https://doi.org/10.1016/J.MOLMET.2021.101257>
- 776 Zapara, T. A., Simonova, O. G., Zharkikh, A. A., & Ratushnyak, A. S. (2000). The Effects of  
777 the Dynamic State of the Cytoskeleton on Neuronal Plasticity. *Translated from*  
778 *Rossiiskii Fiziologicheskii Zhurnal Imeni I. M. Sechenova, I/Ol*, 30(3), 128–138.
- 779
